# Supplementary material for: Discovery and Validation of Lmj_04_BRCT Domain, a Novel Therapeutic Target: Identification of Candidate Drugs for Leishmaniasis
Source: MDPI journal article supplement (doi:10.3390/ijms221910493), 2021-09-28
Supplement: s1 [file s1]

# Discovery and Validation of Lmj\_04\_BRCT Domain, a Novel Therapeutic Target: Identification of Candidate Drugs for Leishmaniasis

José Peña-Guerrero <sup>1</sup>, Celia Fernández-Rubio <sup>1</sup>, Aroia Burguete-Mikeo <sup>1</sup>, Rima El-Dirany <sup>1</sup>, Alfonso T. García-Sosa <sup>2,\*</sup> and Paul Nguewa <sup>1,\*</sup>

<sup>1</sup> Department of Microbiology and Parasitology, ISTUN Instituto de Salud Tropical, IdiSNA, Instituto de Investigación Sanitaria de Navarra, Universidad de Navarra, E-31008 Pamplona, Spain; jpena.1@alumni.unav.es (J.P.-G.); cfdezrubio@unav.es (C.F.-R.); aburguetem@unav.es (A.B.-M.); reldirany@alumni.unav.es (R.E.-D.)

<sup>2</sup> Department of Molecular Technology, Institute of Chemistry, University of Tartu, 50411 Tartu, Estonia

\* Correspondence: alfonso@ut.ee (A.T.G.-S.); panguewa@unav.es (P.N.); Tel.: +372-737-5270 (A.T.G.-S.); +34-948-425-600 (ext. 6434) (P.N.)

Supplementary Materials

| Table S1. Summary of currently available therapeutic options against leishmaniasis |                                                                                              |                                                                           |                                                                                                   |                           |
|------------------------------------------------------------------------------------|----------------------------------------------------------------------------------------------|---------------------------------------------------------------------------|---------------------------------------------------------------------------------------------------|---------------------------|
| Drug                                                                               | Mechanism of action                                                                          | Indications                                                               | Disadvantages                                                                                     | References                |
| Pentavalent antimonials                                                            | Interaction with sulfhydryl-containing molecules                                             | Intralesional (CL)<br>Systemic (MCL)                                      | Local irritation, cardiac and hepatic alterations, anorexia, nausea, and vomiting                 | [1]                       |
| Amphotericin B                                                                     | Parasite membrane disruption                                                                 | Parenteral (VL, and HIV co-infected, pregnant, and transplanted patients) | Fever, hypokalemia, myocarditis, and nephrotoxicity                                               | [2][3][4,5]               |
| Miltefosine                                                                        | Alteration of signaling pathways<br>Apoptosis-like cell death<br>Immunomodulatory properties | Oral (Declining due to emerging resistances, combinatorial therapies)     | Gastrointestinal alterations, hepatotoxicity and teratogenic effects                              | [6][7–11]<br>[12][13][14] |
| Paromomycin                                                                        | Hinders protein synthesis and respiration                                                    | Intramuscular (VL, India)                                                 | Discomfort on application site, low hepato- and ototoxicity                                       | [1][5][15]                |
| Pentamidine                                                                        | Inhibition parasite DNA synthesis                                                            | Intramuscular (complementary for HIV co-infected patients)                | Pancreatitis, diabetes mellitus, hypoglycemia, hypotension, cardiac alterations, and hyperkalemia | [16,17][14][1]            |
| Azoles                                                                             | Inhibition of parasite sterol 14 $\alpha$ -demethylase (CYP51)                               | Combination therapies                                                     | Hepato- and cardiotoxicity                                                                        | [18][19][20,21][22]       |

| <b>Table S2. Previous approaches on the inhibition of tandem BRCT domains.</b> |                                                                                                                                                                                                                                                                                                                                                                                          |                   |
|--------------------------------------------------------------------------------|------------------------------------------------------------------------------------------------------------------------------------------------------------------------------------------------------------------------------------------------------------------------------------------------------------------------------------------------------------------------------------------|-------------------|
| <b>Target</b>                                                                  | <b>Description</b>                                                                                                                                                                                                                                                                                                                                                                       | <b>References</b> |
| BACH1 binding site of BRCT(BRCA1)                                              | Libraries were explored using high throughput fluorescence assays. The pSXXF motif was annotated as the structural minima for BRCT PPI inhibitor design.                                                                                                                                                                                                                                 | [23][24,25]       |
| BRCT(BRCA1), BRCT(MDC1) and BRCT(TopBP1)                                       | Nanomolar affinity with BRCT(BRCA1) using peptidomimetic inhibition strategy was achieved. A conserved hydrophobic cluster (VLPF) relevant for inhibitor design was discovered.                                                                                                                                                                                                          | [26][27]          |
| BRCT(BRCA1)                                                                    | A peptidomimetic BRCT(BRCA1) inhibition strategy was used to generate an effect similar to BRCA1-knockdown in vitro. This discovery opened new therapeutic opportunities as BRCA1-knockdown cells are sensitive to PARP inhibitor olaparib. However, used inhibitors were labile and had short half-lives. Consequently, there was a need for improvement the stability of BRCT binders. | [28]              |
| BRCT(BRCA1)                                                                    | Discovery of the first cell permeable BRCT(BRCA1) protein interaction inhibitor, which also displayed synergism with Olaparib, etoposide, and sensitized treated cells to apoptosis induced by ionizing radiation                                                                                                                                                                        | [29]              |
| BRCT(BRCA1)                                                                    | Discovery of drug-like BRCT(BRCA1) inhibitor bractoppin, which interacted with BRCT in a similar way than the consensus phosphopeptide. Bractoppin was also highly selective for BRCT (BRCA1) and caused similar effects in the treated cell than the previously cited peptide inhibitors.                                                                                               | [30]              |

| Table S3. Primers used in this work. |      |                            |
|--------------------------------------|------|----------------------------|
| Target                               | Type | Sequence                   |
| GAPDH                                | Fw   | CATCAAGTGCGTGAAGGCGC       |
|                                      | Rv   | CGTCGGCGAGTACTCGTGCTG      |
| ABC Transporter A3                   | Fw   | ACGGGAACGGTAACATTGCT       |
|                                      | Rv   | GGCACAGCATCGAAATCGTC       |
| ABC transporter C2                   | Fw   | GCAGCCCCATGATGTTTATT       |
|                                      | Rv   | TCCGTTGCCTTCACTAGCTT       |
| ABC transporter C6                   | Fw   | TGTCCTCTCAACACGCATCC       |
|                                      | Rv   | TCGCAGAGCTCTTCAGTTGG       |
| ABC transporter G4                   | Fw   | TTGGTATCCCCGGCATTCTG       |
|                                      | Rv   | AGCAGCACCACAAAGGGATT       |
| ABC transporter G6                   | Fw   | AGCGCAAGGTGAAAAGCAAG       |
|                                      | Rv   | CTCCTCGACGGTCACATAGC       |
| ABC transporter H1                   | Fw   | CGGGTTTGTCTTTCAGTCGT       |
|                                      | Rv   | CACCAGAGAGCATTGATGGA       |
| APG9                                 | Fw   | TCACTCTCGTTTGGTGGCTC       |
|                                      | Rv   | AAAGGTCGTCGTGATGTGCT       |
| Cyclin (CYCA)                        | Fw   | CCCCAACACCGCTGACTAAT       |
|                                      | Rv   | TCCGACTGGCGGTCTATGTA       |
| Cyclin 6                             | Fw   | AGTACCCTGCACGCCTACTA       |
|                                      | Rv   | TTGTTGTTGGCGCAGGAAAG       |
| His-Lys-N                            | Fw   | ACGCTAGAGTGCCGAAGAAG       |
|                                      | Rv   | ACACTTCGCACCCGTCATAA       |
| Hsp70                                | Fw   | CAAGGGTAAGAACCTGGCGT       |
|                                      | Rv   | GATGGTGGCCTGGAAGTCAA       |
| MCM4                                 | Fw   | CGAGTTCGACAAGATGAACG       |
|                                      | Rv   | ATTCCACTGTGAGTCCTTCG       |
| MRPA                                 | Fw   | ATGGCGACACCAGACTTTGT       |
|                                      | Rv   | CTGCGAGGGAGCATGGTTTA       |
| PCNA                                 | Fw   | AGATGGACTACCGCAGCA         |
|                                      | Rv   | CTCTGATTTACCTCCGACTTG      |
| PPG3                                 | Fw   | CTGGAGAACGTATCCTTTGC       |
|                                      | Rv   | ACCTACCGTCTGTCCACG         |
| PRP1                                 | Fw   | CTCATGCGTCAGTGCAAGTG       |
|                                      | Rv   | AAACAACGGGCAAAAAGCGA       |
| TOP2                                 | Fw   | AGTATAAGAAGCTACCCCCG       |
|                                      | Rv   | GTTGTTGATGTTGTCTGCCG       |
| Yip1                                 | Fw   | AAGCTCCTTGGCAGCAAGAT       |
|                                      | Rv   | TGTGTCGGAAAAAGCGCAAG       |
| $\alpha$ -Tubulin                    | Fw   | ATGCGTGAGGCTATCTGCATCCACAT |
|                                      | Rv   | TAGTGGCCACGAGCGTAGTTGTTTCG |

## References

1. Roatt, B.M.; de Oliveira Cardoso, J.M.; De Brito, R.C.F.; Coura-Vital, W.; de Oliveira Aguiar-Soares, R.D.; Reis, A.B. Recent Advances and New Strategies on Leishmaniasis Treatment. *Appl. Microbiol. Biotechnol.* **2020**, *1*–13.
2. Sundar, S.; Chakravarty, J. Leishmaniasis: An Update of Current Pharmacotherapy. *Expert Opin. Pharmacother.* **2013**, *14*, 53–63.
3. Gray, K.C.; Palacios, D.S.; Dailey, I.; Endo, M.M.; Uno, B.E.; Wilcock, B.C.; Burke, M.D. Amphotericin Primarily Kills Yeast by Simply Binding Ergosterol. *Proc. Natl. Acad. Sci. U. S. A.* **2012**, *109*, 2234–2239, doi:10.1073/pnas.1117280109.
4. Sundar, S.; Chakravarty, J.; Rai, V.K.; Agrawal, N.; Singh, S.P.; Chauhan, V.; Murray, H.W. Amphotericin B Treatment for Indian Visceral Leishmaniasis: Response to 15 Daily versus Alternate-Day Infusions. *Clin. Infect. Dis.* **2007**, *45*, 556–561, doi:10.1086/520665.
5. Sundar, S.; Jha, T.K.; Thakur, C.P.; Sinha, P.K.; Bhattacharya, S.K. Injectable Paromomycin for Visceral Leishmaniasis in India. *N. Engl. J. Med.* **2007**, *356*, 2571–2581, doi:10.1056/NEJMoa066536.
6. Croft, S.L.; Neal, R.A.; Pendergast, W.; Chan, J.H. The Activity of Alkyl Phosphorylcholines and Related Derivatives against *Leishmania Donovanii*. *Biochem. Pharmacol.* **1987**, *36*, 2633–2636, doi:10.1016/0006-2952(87)90543-0.
7. Hilgard, P.; Klenner, T.; Stekar, J.; Nössner, G.; Kutscher, B.; Engel, J. D-21266, a New Heterocyclic Alkylphospholipid with Antitumour Activity. *Eur. J. Cancer Part A* **1997**, *33*, 442–446, doi:10.1016/S0959-8049(97)89020-X.
8. Zeisig, R.; Rudolf, M.; Eue, I.; Arndt, D. Influence of Hexadecylphosphocholine on the Release of Tumor Necrosis Factor and Nitroxide from Peritoneal Macrophages in Vitro. *J. Cancer Res. Clin. Oncol.* **1995**, *121*, 69–75, doi:10.1007/BF01202215.
9. Wadhwa, P.; Maiti, M.; Agarwal, R.; Kamat, V.; Martin, S.; Saha, B. Miltefosine Promotes IFN- $\gamma$ -Dominated Anti-Leishmanial Immune Response. *J. Immunol.* **2009**, *182*, 7146–7154, doi:10.4049/jimmunol.0803859.
10. Hochhuth, C.H.; Vehmeyer, K.; Eibl, H.; Unger, C. Hexadecylphosphocholine Induces Interferon- $\gamma$  Secretion and Expression of GM-CSF mRNA in Human Mononuclear Cells. *Cell. Immunol.* **1992**, *141*, 161–168, doi:10.1016/0008-8749(92)90135-C.
11. Eue, I. Hexadecylphosphocholine Selectively Upregulates Expression of Intracellular Adhesion Molecule-1 and Class I Major Histocompatibility Complex Antigen in Human Monocytes. *J. Exp. Ther. Oncol.* **2002**, *2*, 333–336, doi:10.1046/j.1359-4117.2002.01048.x.
12. Verma, N.K.; Dey, C.S. Possible Mechanism of Miltefosine-Mediated Death of *Leishmania Donovanii*. *Antimicrob. Agents Chemother.* **2004**, *48*, 3010–3015, doi:10.1128/AAC.48.8.3010-3015.2004.
13. Srivastava, S.; Mishra, J.; Gupta, A.K.; Singh, A.; Shankar, P.; Singh, S. Laboratory Confirmed Miltefosine Resistant Cases of Visceral Leishmaniasis from India. *Parasites and Vectors* **2017**, *10*, 1–11, doi:10.1186/s13071-017-1969-z.
14. Sundar, S.; Chakravarty, J. An Update on Pharmacotherapy for Leishmaniasis. *Expert Opin. Pharmacother.* **2015**, *16*, 237–252.
15. Kim, D.H.; Chung, H.J.; Bleys, J.; Ghohestani, R.F. Is Paromomycin an Effective and Safe Treatment against Cutaneous Leishmaniasis? A Meta-Analysis of 14 Randomized Controlled Trials. *PLoS Negl. Trop. Dis.* **2009**, *3*, e381, doi:10.1371/journal.pntd.0000381.
16. Nguema, P.A.; Fuertes, M.A.; Cepeda, V.; Iborra, S.; Carrión, J.; Valladares, B.; Alonso, C.; Pérez, J.M. Pentamidine Is an Antiparasitic and Apoptotic Drug That Selectively Modifies Ubiquitin. *Chem. Biodivers.* **2005**, *2*, 1387–1400, doi:10.1002/cbdv.200590111.
17. Yang, G.; Choi, G.; No, J.H. Antileishmanial Mechanism of Diamidines Involves Targeting Kinetoplasts. *Antimicrob. Agents Chemother.* **2016**, *60*, 6828–6836, doi:10.1128/AAC.01129-16.

18. Saccoliti, F.; Madia, V.N.; Tudino, V.; De Leo, A.; Pescatori, L.; Messori, A.; De Vita, D.; Scipione, L.; Brun, R.; Kaiser, M.; et al. Biological Evaluation and Structure-Activity Relationships of Imidazole-Based Compounds as Antiprotozoal Agents. *Eur. J. Med. Chem.* **2018**, *156*, 53–60, doi:10.1016/j.ejmech.2018.06.063.
19. Pandharkar, T.; Zhu, X.; Mathur, R.; Jiang, J.; Schmittgen, T.D.; Shaha, C.; Werbovetz, K.A. Studies on the Antileishmanial Mechanism of Action of the Arylimidamide DB766: Azole Interactions and Role of CYP5122A1. *Antimicrob. Agents Chemother.* **2014**, *58*, 4682–4689, doi:10.1128/AAC.02405-14.
20. Emad, M.; Hayati, F.; Fallahzadeh, M.K.; Namazi, M.R. Superior Efficacy of Oral Fluconazole 400 Mg Daily versus Oral Fluconazole 200 Mg Daily in the Treatment of Cutaneous Leishmania Major Infection: A Randomized Clinical Trial. *J. Am. Acad. Dermatol.* **2011**, *64*, 606–608, doi:10.1016/j.jaad.2010.04.014.
21. Alrajhi, A.A.; Ibrahim, E.A.; De Vol, E.B.; Khairat, M.; Faris, R.M.; Maguire, J.H. Fluconazole for the Treatment of Cutaneous Leishmaniasis Caused by *Leishmania Major*. *N. Engl. J. Med.* **2002**, *346*, 891–895, doi:10.1056/NEJMoa011882.
22. Galvão, E.L.; Rabello, A.; Cota, G.F. Efficacy of Azole Therapy for Tegumentary Leishmaniasis: A Systematic Review and Meta-Analysis. *PLoS One* **2017**, *12*, e0186117, doi:10.1371/journal.pone.0186117.
23. Lokesh, G.L.; Muralidhara, B.K.; Negi, S.S.; Natarajan, A. Thermodynamics of Phosphopeptide Tethering to BRCT: The Structural Minima for Inhibitor Design. *J. Am. Chem. Soc.* **2007**, *129*, 10658–10659, doi:10.1021/ja0739178.
24. Lokesh, G.L.; Rachamalla, A.; Kumar, G.D.K.; Natarajan, A. High-Throughput Fluorescence Polarization Assay to Identify Small Molecule Inhibitors of BRCT Domains of Breast Cancer Gene 1. *Anal. Biochem.* **2006**, *352*, 135–141, doi:10.1016/j.ab.2006.01.025.
25. Simeonov, A.; Yasgar, A.; Jadhav, A.; Lokesh, G.L.; Klumpp, C.; Michael, S.; Austin, C.P.; Natarajan, A.; Inglese, J. Dual-Fluorophore Quantitative High-Throughput Screen for Inhibitors of BRCT-Phosphoprotein Interaction. *Anal. Biochem.* **2008**, *375*, 60–70, doi:10.1016/j.ab.2007.11.039.
26. Yuan, Z.; Kumar, E.A.; Kizhake, S.; Natarajan, A. Structure-Activity Relationship Studies to Probe the Phosphoprotein Binding Site on the Carboxy Terminal Domains of the Breast Cancer Susceptibility Gene 1. *J. Med. Chem.* **2011**, *54*, 4264–4268, doi:10.1021/jm1016413.
27. Yuan, Z.; Kumar, E.A.; Campbell, S.J.; Palermo, N.Y.; Kizhake, S.; Glover, J.N.M.; Natarajan, A. Guided Inhibitor Design. **2011**, 764–767.
28. Pessetto, Z.Y.; Yan, Y.; Bessho, T.; Natarajan, A. Inhibition of BRCT(BRCA1)-Phosphoprotein Interaction Enhances the Cytotoxic Effect of Olaparib in Breast Cancer Cells: A Proof of Concept Study for Synthetic Lethal Therapeutic Option. *Breast Cancer Res. Treat.* **2012**, *134*, 511–517, doi:10.1007/s10549-012-2079-4.
29. Na, Z.; Pan, S.; Uttamchandani, M.; Yao, S.Q. Discovery of Cell-Permeable Inhibitors That Target the BRCT Domain of BRCA1 Protein by Using a Small-Molecule Microarray. *Angew. Chemie - Int. Ed.* **2014**, *53*, 8421–8426, doi:10.1002/anie.201405169.
30. Periasamy, J.; Kurdekar, V.; Jasti, S.; Nijaguna, M.B.; Boggaram, S.; Hurakadli, M.A.; Raina, D.; Kurup, L.M.; Chintha, C.; Manjunath, K.; et al. Targeting Phosphopeptide Recognition by the Human BRCA1 Tandem BRCT Domain to Interrupt BRCA1-Dependent Signaling. *Cell Chem. Biol.* **2018**, *25*, 677–690.e12, doi:10.1016/j.chembiol.2018.02.012.
